# Supplementary material for: Electrochemically induced crystallization of amorphous materials in molten MgCl2: boron nitride and hard carbon
Source: Royal Society of Chemistry journal article supplement (doi:10.1039/c9cc08717f), 2020-01-01
Supplement: c9cc08717f1.pdf [file c9cc08717f1.pdf]

## Supporting Information

Electrochemically Induced Crystallization of Amorphous Materials in Molten

MgCl<sub>2</sub>: Boron Nitride and Hard Carbon

Prashant Bagri<sup>1</sup>, Bishnu P. Thapaliya<sup>1,2</sup>, Zhenzhen Yang<sup>2</sup>, Wei Jiang<sup>2</sup>, Dino Sulejmanovic<sup>3</sup>,  
Huimin Luo<sup>4</sup>, Sheng Dai<sup>1,2\*</sup>

<sup>1</sup>Chemical Science Division, Oak Ridge National Laboratory, Oak Ridge, Tennessee 37831

<sup>2</sup>Department of Chemistry, University of Tennessee, Knoxville, Tennessee 37916

<sup>3</sup>Materials Science and Technology Division, Oak Ridge National Laboratory, Oak Ridge,  
Tennessee 37831

<sup>4</sup>Energy and Transportation Science Division, Oak Ridge National Laboratory, Oak Ridge,  
Tennessee 37831

\*Correspondence and requests for materials should be addressed to S. Dai ([dais@ornl.gov](mailto:dais@ornl.gov))

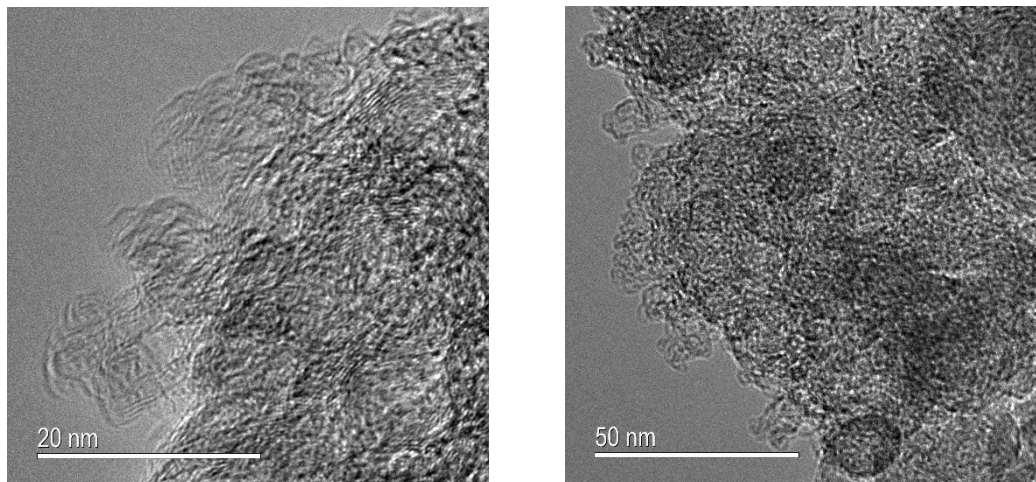

**Figure S1:** TEM images of hard carbon prior to electrochemical treatment

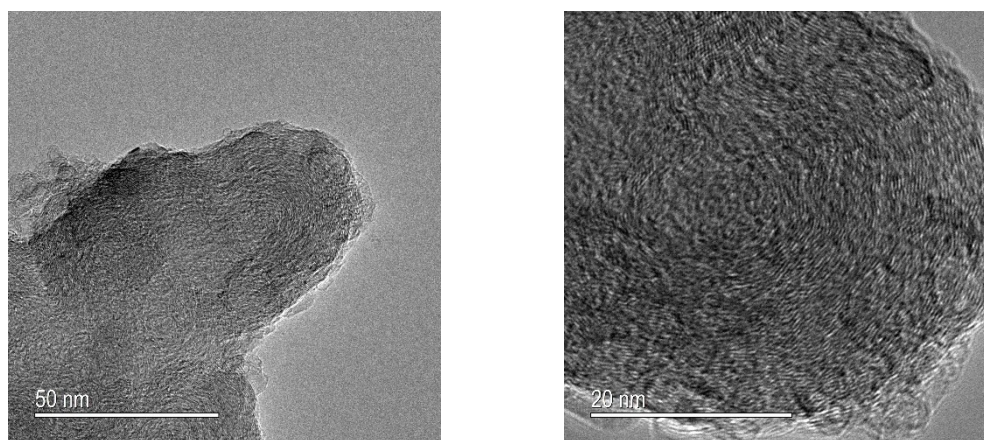

**Figure S2:** TEM images of EGC post electrochemical treatment in molten MgCl<sub>2</sub>

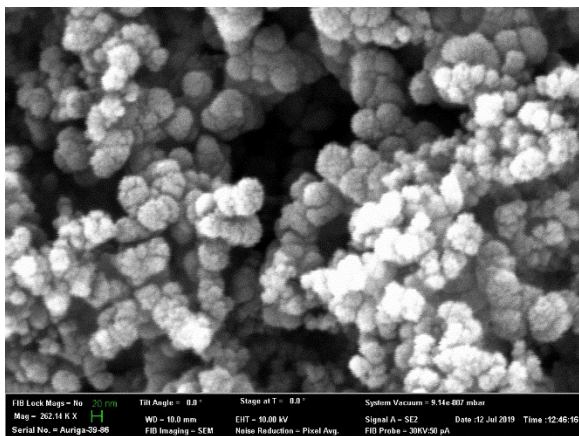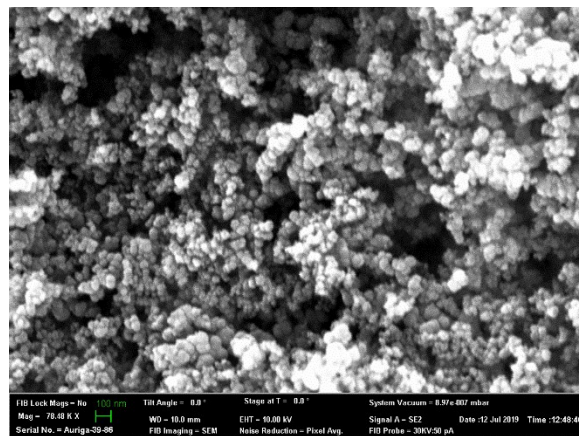

Figure S3: SEM images of hard carbons prior to electrochemical treatment

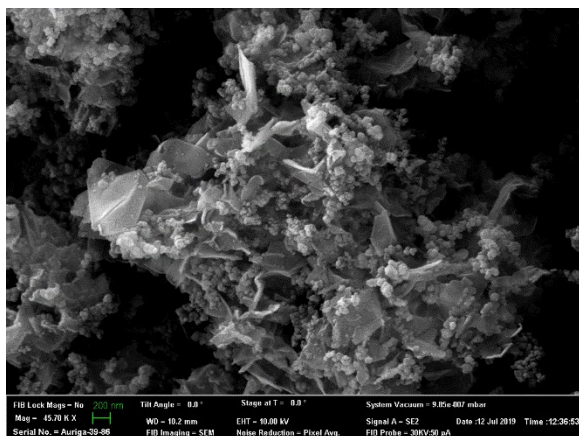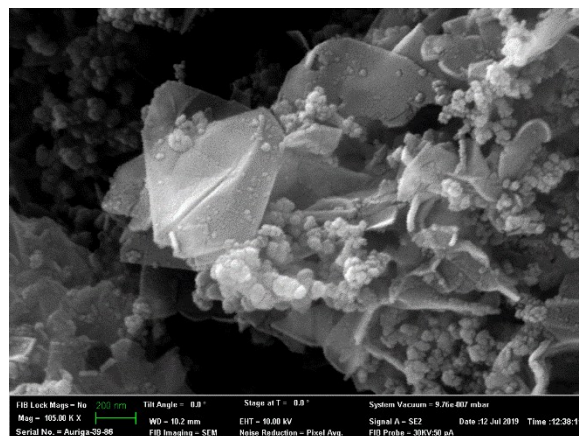

Figure S4: SEM images of EGC post electrochemical treatment in MgCl<sub>2</sub>

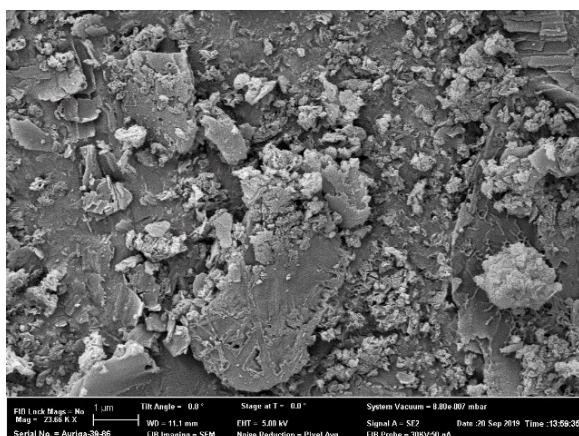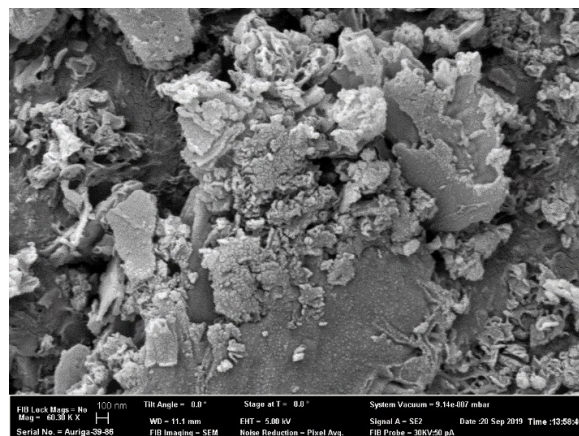

**Figure S5:** SEM images of amorphous BN prior to electrochemical treatment

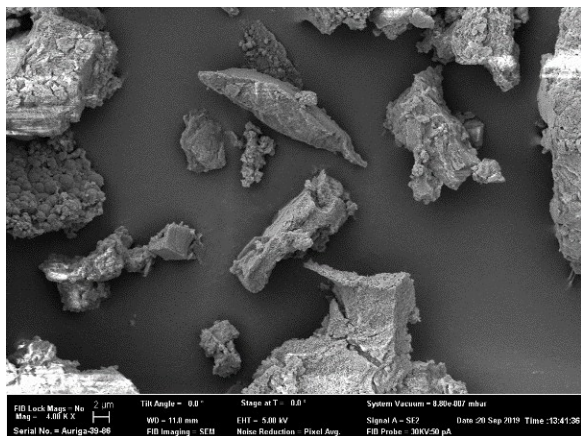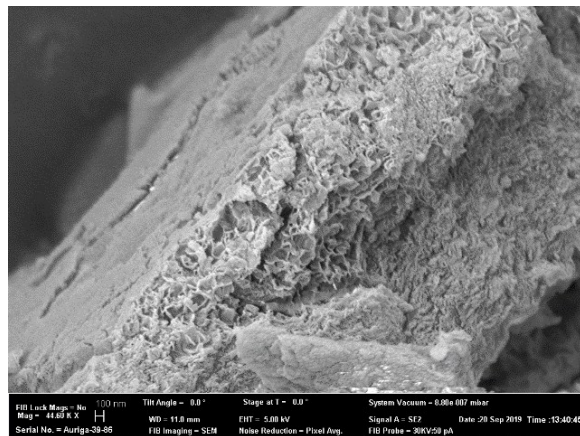

**Figure S6:** SEM images of h-BN post

electrochemical treatment in  $\text{MgCl}_2$

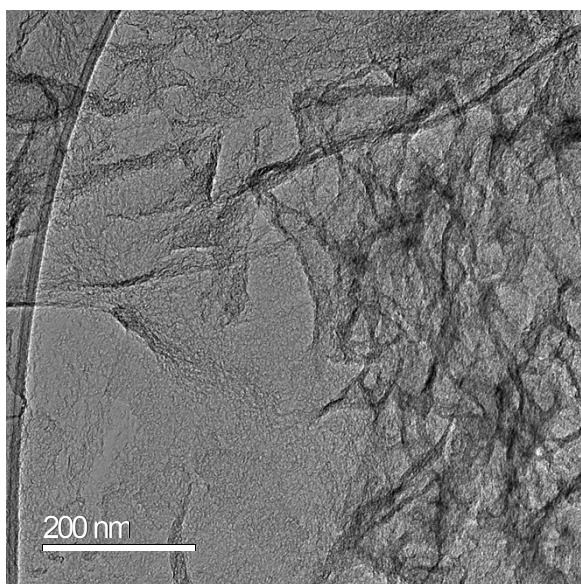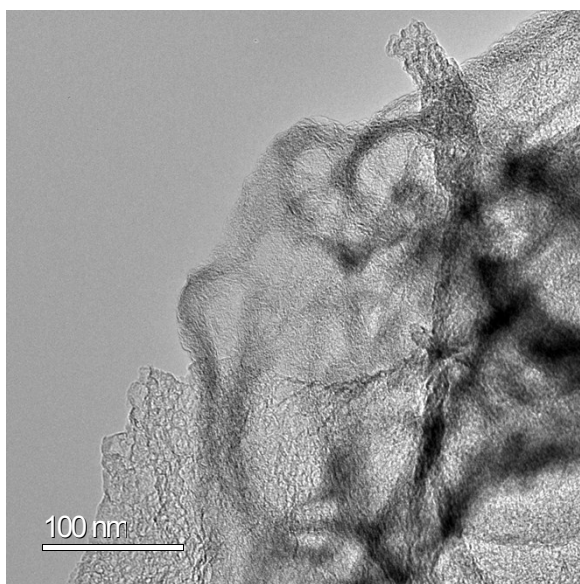

**Figure S7:** TEM images of amorphous BN prior to electrochemical treatment

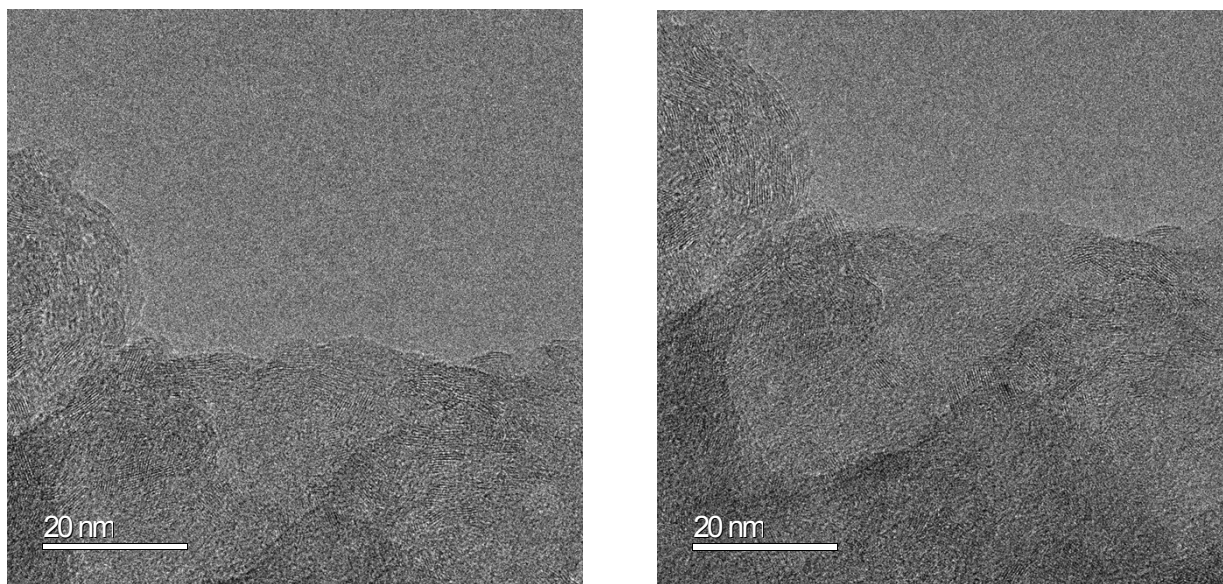

**Figure S8:** TEM images of h-BN post electrochemical treatment in  $\text{MgCl}_2$

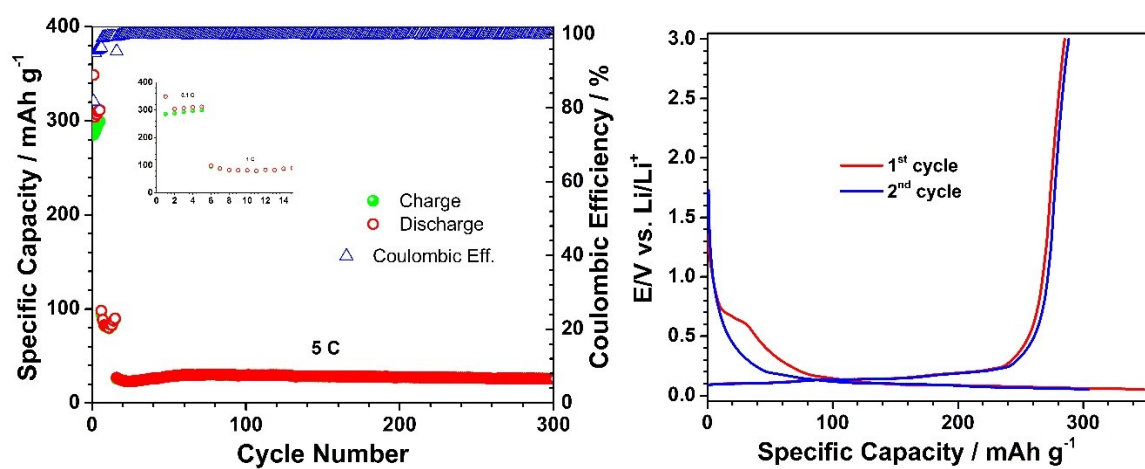

**Figure S9:** Cycling stability and charge-discharge profiles for commercial synthetic graphite.

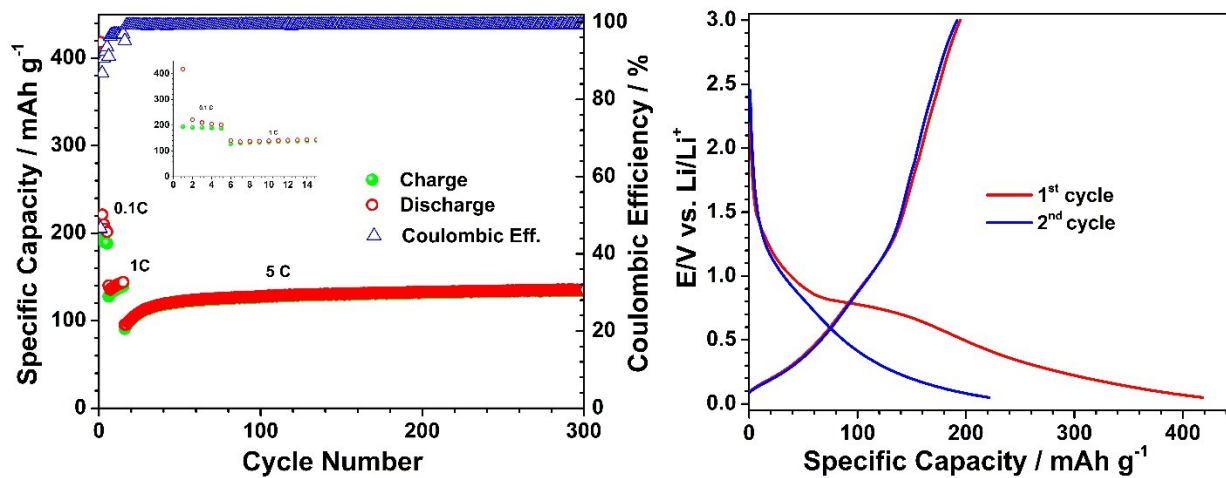

**Figure S10:** Cycling stability and charge-discharge profiles for hard carbon.

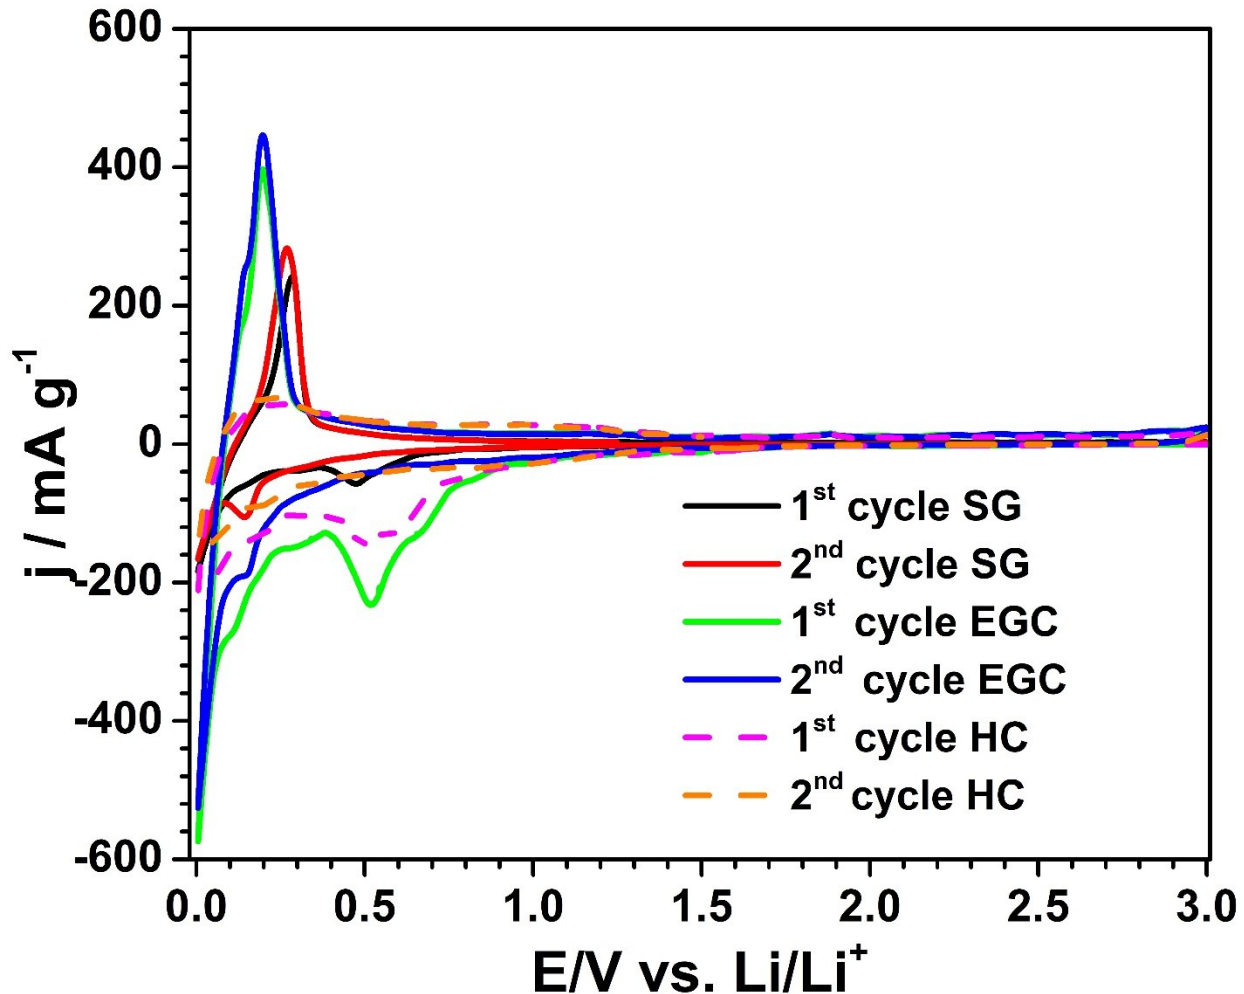

**Figure S11:** Comparison of cyclic voltammetry of EGC, synthetic graphite, and hard carbon at a scan rate of  $0.1 \text{ mV s}^{-1}$  vs.  $\text{Li/Li}^+$ .

### **MgCl<sub>2</sub> Dehydration:**

Dehydration of  $\text{MgCl}_2$ , which forms hydrates with up to 12 hydration waters, proceeds with the sequential release of water down to the monohydrate. Upon further heating, the monohydrate hydrolyzes into  $\text{MgO}$  and  $\text{HCl}$ [1]. To aid in the dehydration of  $\text{MgCl}_2$  while preventing hydrolysis, ammonium chloride has been used. When heated in the presence of hydrated  $\text{MgCl}_2$ , ammonium chloride forms a carnallite intermediate that facilitates the release of water[2,3].

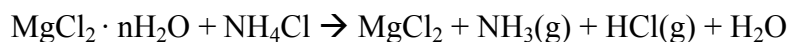

Commercial anhydrous  $\text{MgCl}_2$  (Alpha Aesar, 99.9%) was stored in a vacuum oven at 120 °C. 500 g of  $\text{MgCl}_2 \cdot x\text{H}_2\text{O}$  was weighed and mixed with 250 g of  $\text{NH}_4\text{Cl}$  (Alpha Aesar, 99%). The mixture was then added to a 12-inch long quartz crucible with a 3-inch inner diameter. The crucible was placed in a quartz reactor equipped with a sealed, removable 3-port head. The assembled reactor was placed in a Lindberg Blue tube furnace, and the reactor was purged with UHP Ar (Airgas) for 1 hour. UHP Ar was constantly flowing at 0.5 L/min during the heating and cooling. The salt was heated from room temperature to 400 °C at 20 °C/min and held at this temperature for 2 hours. The salt mixture was then heated to 850 °C at 20 C/min for 1 hour to remove excess ammonium chloride and fuse  $\text{MgCl}_2$ . After 1 hour at 850 °C the furnace was turned off and allowed to cool to room temperature. Once cooled, the reactor was kept under UHP Ar and was transferred into a UHP Ar-blanketed glovebox. The fused  $\text{MgCl}_2$  salt was retrieved and was broken into smaller pieces. The salt was then stored in Mason jars inside the glovebox before being used for the electrochemical experiments.

### **Synthesis of BN:**

0.05 mol boric acid and 1.2 mol urea were dissolved in deionized water (200 ml). The homogeneous solution was heated to 60 °C for recrystallization. A white powder was obtained by the subsequent evaporation of water. Then the precursors were heated with at  $5^\circ\text{C}\cdot\text{min}^{-1}$  to 900 °C and kept for 120 min under  $\text{N}_2$  atmosphere.



## REFERENCES

1. Skar, R. A. Chemical and Electrochemical Characterization of Oxide/Hydroxide Impurities in the Electrolyte for Magnesium Production. Nnorges Teknisk-Naturvitenskapelige Universitet, 2001.
2. Kipouros, G. J.; Sadoway, D. R. A thermochemical analysis of the production of anhydrous MgCl<sub>2</sub>. *Journal of Light Metals* **2001**, *1*, 111-117.
3. Dai, Sheng, et al. "Measurement of molten salt Raman spectra by the use of fiber optics." *Microchimica Acta* 108.3-6 (1992): 261-264.
